# Supplementary material for: Treatment of Visceral Leishmaniasis: Model-Based Analyses on the Spread of Antimony-Resistant L. donovani in Bihar, India
Source: PLoS Negl Trop Dis. 2012 Dec 20;6(12):e1973. doi: 10.1371/journal.pntd.0001973 (PMC3527335; doi:10.1371/journal.pntd.0001973)
Supplement: Table S2 — Model variables—humans. (DOC) [file pntd.0001973.s004.doc]

## Table S2 – Model variables – humans.

| *SH*, *SV* | Number of humans in the susceptible stage |
| --- | --- |
| *IHP*, *IVP*, *IHPr*, *IVPr* | Number of humans in the early asymptomatic, infectious stage |
| *IHD*, *IVD*, *IHDr*, *IVDr* | Number of humans in the late asymptomatic, infectious stage |
| *RHD*, *RVD* | Number of humans in the early recovered stage |
| *RHC*, *RVC* | Number of humans in the late recovered stage |
| *IHS*, *IVS*, *IHSr*, *IVSr* | Number of humans with symptomatic KA, eligible for treatment |
| *IHT1*, *IVT1*, *IHT1r*, *IVT1r* | Number of humans under first-line KA treatment |
| *IHT2*, *IVT2*, *IHT2r*, *IVT2r* | Number of humans under second-line KA treatment |
| *RHT*, *RVT* | Number of humans recovered after treatment |
| *RHL*, *RVL*, *RHLr*, *RVLr* | Number of humans putatively recovered under KA treatment but will develop PKDL |
| *IHL*, *IVL*, *IHLr*, *IVLr* | Number of humans with PKDL |

For immuno-compromised humans, index *H* is replaced by index *V*. Humans infected with antimony-resistant parasites are indicated with an additional index *r*.
