# Supplementary material for: Treatment of Visceral Leishmaniasis: Model-Based Analyses on the Spread of Antimony-Resistant L. donovani in Bihar, India
Source: PLoS Negl Trop Dis. 2012 Dec 20;6(12):e1973. doi: 10.1371/journal.pntd.0001973 (PMC3527335; doi:10.1371/journal.pntd.0001973)
Supplement: Table S6 — Model parameters—immuno-compromised humans [61] . (DOC) [file pntd.0001973.s008.doc]

## Table S6 – Model parameters – immuno-compromised humans.

|  | Description | Reference |
| --- | --- | --- |
| *V* | Excess mortality rate in immuno-compromised patients, assuming *V* = 0.2/year | Assumed |
| ** | Rate of developing AIDS or other immuno-compromising disease **= 1.9x10-6day | Estimated |
| *fVS* | Fraction of individuals in stage *IVD* who develop symptomatic KA: *fVS* = 0.034 | Estimated |
| *fVL* | Fraction of individuals in stage *IVD* who go directly to *RVL* and will later develop PKDL: *fVL = fHL* | Assumed |
| *fVR* | Fraction of individuals in stage *IVD* who recover without showing a symptomatic course of infection (→*RVD*): *fVR* = 1–(*fVS*+*fVL*) |  |
| *p6* | Proportion of immuno-compromised KA patients not responding to KA first-line treatment, derived from *p6* = (1-*fT*) *f4*, assuming that *f4* = 30% of immuno-compromised KA patients who are not killed by the treatment, do not respond to KA first-line treatment |  |
| *p7* | Proportion of immuno-compromised KA patients who appear to recover under KA first-line treatment but will develop PKDL later, derived from *p7* = (1-*fT*)(1-*f4*) *f2*, assuming that a fraction *f2* = 3% of immuno-compromised KA patients who are neither killed by the treatment nor experienced obvious treatment failure appear to recover under KA treatment but will develop PKDL |  |
| *p8* | Proportion of immuno-compromised KA patients recovering during first-line treatment, derived from *p8* = (1-*fT*)(1-*f4*)(1-*f2*) |  |
